# Supplementary material
Source: Springer Nature journal article supplement (https://www.springermedizin.de/resource/supplementary/12883_2011_528_MOESM5_ESM.pdf/9455324)

sensitivity

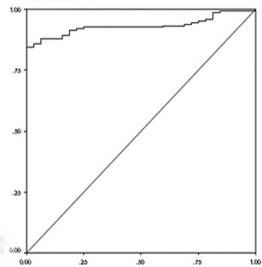

1-specificity

a

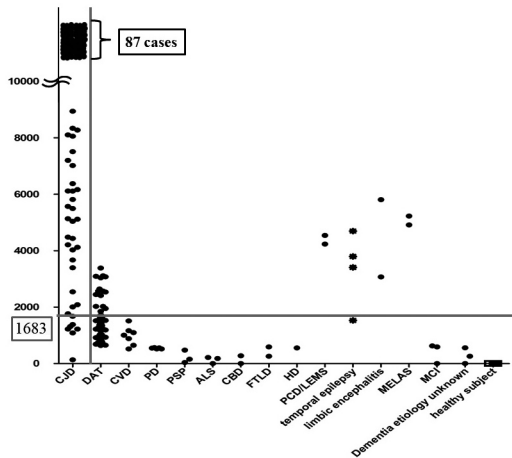

b

AU/ml

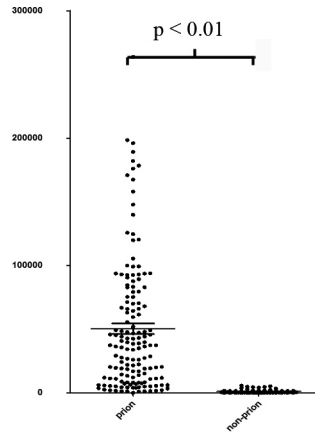

c

Supplement: MOESM5 [file 9455324]
